# Supplementary material for: The Discrimination and Characterization of Volatile Organic Compounds in Different Areas of Zanthoxylum bungeanum Pericarps and Leaves by HS-GC-IMS and HS-SPME-GC-MS
Source: MDPI journal article supplement (doi:10.3390/foods11223745), 2022-11-21
Supplement: s1 [file s1]

**Table S1.** Detailed information of all the samples.

| Origin |                          |              | Batch number |                         |              |
|--------|--------------------------|--------------|--------------|-------------------------|--------------|
| Origin |                          |              | Batch number |                         |              |
| SHJ1   | Hancheng, Shannxi, China | 202007301001 | SJ1          | Maoxian, Sichuan, China | 202007302001 |
| SHJ2   | Hancheng, Shannxi, China | 202007301002 | SJ2          | Maoxian, Sichuan, China | 202007302002 |
| SHJ3   | Hancheng, Shannxi, China | 202007301003 | SJ3          | Maoxian, Sichuan, China | 202007302003 |
| SHJ4   | Hancheng, Shannxi, China | 202007301004 | SJ4          | Maoxian, Sichuan, China | 202007302004 |
| SHJ5   | Hancheng, Shannxi, China | 202007301005 | SJ5          | Maoxian, Sichuan, China | 202007302005 |
| SHJ6   | Hancheng, Shannxi, China | 202007301006 | SJ6          | Maoxian, Sichuan, China | 202007302006 |
| SHJ Y1 | Hancheng, Shannxi, China | 202007301101 | SJY 1        | Maoxian, Sichuan, China | 202007302101 |
| SHJ Y2 | Hancheng, Shannxi, China | 202007301102 | SJY 2        | Maoxian, Sichuan, China | 202007302102 |
| SHJ Y3 | Hancheng, Shannxi, China | 202007301103 | SJY 3        | Maoxian, Sichuan, China | 202007302103 |
| SHJ Y4 | Hancheng, Shannxi, China | 202007301104 | SJY 4        | Maoxian, Sichuan, China | 202007302104 |
| SHJ Y5 | Hancheng, Shannxi, China | 202007301105 | SJY 5        | Maoxian, Sichuan, China | 202007302105 |
| SHJ Y6 | Hancheng, Shannxi, China | 202007301106 | SJY 6        | Maoxian, Sichuan, China | 202007302106 |
