# Supplementary material for: The Discrimination and Characterization of Volatile Organic Compounds in Different Areas of Zanthoxylum bungeanum Pericarps and Leaves by HS-GC-IMS and HS-SPME-GC-MS
Source: MDPI journal article supplement (doi:10.3390/foods11223745), 2022-11-21
Supplement: s1 [file s1]

**Table S2.** Reproducibility.

| Ingredients   |                      | Peak area  |            |            |            |            |            | SD        | Average value | RSD    |
|---------------|----------------------|------------|------------|------------|------------|------------|------------|-----------|---------------|--------|
| HS-SPME-GC-MS | $\alpha$ -Thujene    | 255609091  | 251119081  | 245497443  | 242395244  | 242633284  | 262933508  | 8153010   | 215477237     | 3.78%  |
|               | Sabinene             | 335111735  | 329904053  | 317248321  | 301984044  | 301493178  | 336233231  | 15899507  | 276839153     | 5.74%  |
|               | Myrcene              | 255165365  | 252947601  | 236982620  | 225789060  | 230209760  | 248741438  | 12367875  | 208886245     | 5.92%  |
|               | Limonene             | 950798406  | 953636571  | 904113503  | 777755354  | 780156593  | 904722789  | 80046429  | 764461378     | 10.47% |
|               | $\gamma$ -Terpinene  | 283516364  | 276981098  | 269480052  | 262194074  | 263826941  | 302902074  | 15238598  | 239162743     | 6.37%  |
|               | Linalool             | 1155348010 | 1134189372 | 1101812909 | 1126068108 | 1126037418 | 1079940097 | 26297287  | 964241886     | 2.73%  |
|               | L-Menthol            | 218817611  | 208942347  | 204014592  | 203238657  | 218532148  | 220357540  | 7852017   | 183107845     | 4.29%  |
|               | $\gamma$ -Terpineol  | 911458474  | 922719525  | 911417656  | 860773590  | 899666193  | 908396175  | 21690748  | 776588909     | 2.79%  |
|               | Linalyl acetate      | 6750780263 | 6744463121 | 6471706326 | 6487839687 | 6792584564 | 6638973413 | 139703559 | 5718007276    | 2.44%  |
| HS-GC-IMS     | (E,E)-2,4-Hexadienal | 14517      | 13921      | 13314      | 13427      | 13783      | 13595      | 433       | 11856         | 3.65%  |
|               | Acetone              | 7790       | 7027       | 7304       | 7174       | 6879       | 7220       | 312       | 6244          | 4.99%  |
|               | $\alpha$ -Pinene     | 15901      | 14909      | 17131      | 15697      | 15369      | 17146      | 925       | 13868         | 6.67%  |
|               | Nerol                | 20470      | 20077      | 19957      | 20189      | 20165      | 19905      | 202       | 17281         | 1.17%  |
|               | 4-Terpineol          | 7406       | 6954       | 7475       | 6819       | 6944       | 6998       | 272       | 6124          | 4.44%  |
|               | 1,8-Cineole          | 9423       | 9072       | 8730       | 8855       | 8842       | 8926       | 247       | 7728          | 3.20%  |
