# Supplementary material for: The Discrimination and Characterization of Volatile Organic Compounds in Different Areas of Zanthoxylum bungeanum Pericarps and Leaves by HS-GC-IMS and HS-SPME-GC-MS
Source: MDPI journal article supplement (doi:10.3390/foods11223745), 2022-11-21
Supplement: s1 [file s1]

**Table S3.** Composition detected by HS-SPME-GC-MS

| Count | Formula                                        | Rt    | RIRef | RIExp | Compound                       | CAS        |
|-------|------------------------------------------------|-------|-------|-------|--------------------------------|------------|
| 1     | C <sub>2</sub> H <sub>4</sub> O <sub>2</sub>   | 1.67  | 610   | -     | Acetic Acid                    | 64-19-7    |
| 2     | C <sub>10</sub> H <sub>16</sub>                | 5.13  | 929   | 921   | $\alpha$ -Thujene              | 2867-05-2  |
| 3     | C <sub>10</sub> H <sub>16</sub>                | 5.26  | 937   | 929   | 2-Pinene                       | 80-56-8    |
| 4     | C <sub>10</sub> H <sub>16</sub>                | 6.01  | 974   | 970   | Sabinene                       | 3387-41-5  |
| 5     | C <sub>10</sub> H <sub>16</sub>                | 6.10  | 979   | 975   | $\beta$ -Pinene                | 127-91-3   |
| 6     | C <sub>10</sub> H <sub>16</sub>                | 6.35  | 991   | 987   | Myrcene                        | 123-35-3   |
| 7     | C <sub>10</sub> H <sub>16</sub>                | 6.70  | 1005  | 1003  | $\alpha$ -Phellandrene         | 99-83-2    |
| 8     | C <sub>10</sub> H <sub>16</sub>                | 6.98  | 1017  | 1015  | $\alpha$ -Terpinene            | 99-86-5    |
| 9     | C <sub>10</sub> H <sub>14</sub>                | 7.19  | 1025  | 1023  | P-Cymene                       | 99-87-6    |
| 10    | C <sub>10</sub> H <sub>16</sub>                | 7.29  | 1030  | 1027  | Limonene                       | 138-86-3   |
| 11    | C <sub>10</sub> H <sub>18</sub> O              | 7.36  | 1032  | 1030  | 1,8-Cineole                    | 470-82-6   |
| 12    | C <sub>10</sub> H <sub>16</sub>                | 7.49  | 1037  | 1035  | Ocimene                        | 13877-91-3 |
| 13    | C <sub>10</sub> H <sub>16</sub>                | 7.78  | 1049  | 1046  | (E)-B-Ocimene                  | 3779-61-1  |
| 14    | C <sub>10</sub> H <sub>16</sub>                | 8.11  | 1060  | 1058  | $\gamma$ -Terpinene            | 99-85-4    |
| 15    | C <sub>10</sub> H <sub>18</sub> O              | 8.35  | 1070  | 1066  | Trans-Sabinene hydrate         | 17699-16-0 |
| 16    | C <sub>10</sub> H <sub>16</sub>                | 9.02  | 1088  | 1088  | Terpinolene                    | 586-62-9   |
| 17    | C <sub>10</sub> H <sub>18</sub> O              | 9.44  | 1099  | 1101  | Linalool                       | 78-70-6    |
| 18    | C <sub>10</sub> H <sub>16</sub> O              | 11.01 | 1144  | 1145  | Trans-Verbenol                 | 1820-09-3  |
| 19    | C <sub>10</sub> H <sub>18</sub> O              | 11.32 | 1152  | 1153  | (+)-Citronellal                | 2385-77-5  |
| 20    | C <sub>10</sub> H <sub>20</sub> O              | 12.09 | 1175  | 1172  | L-Menthol                      | 2216-51-5  |
| 21    | C <sub>10</sub> H <sub>18</sub> O              | 12.29 | 1177  | 1177  | 4-Terpineol                    | 562-74-3   |
| 22    | C <sub>9</sub> H <sub>14</sub> O               | 12.73 | 1184  | 1184  | 4-Isopropylcyclohex-2-en-1-one | 500-02-7   |
| 23    | C <sub>10</sub> H <sub>18</sub> O              | 12.86 | 1189  | 1190  | $\alpha$ -Terpineol            | 98-55-5    |
| 24    | C <sub>10</sub> H <sub>18</sub> O              | 14.27 | 1197  | 1222  | $\gamma$ -Terpineol            | 586-81-2   |
| 25    | C <sub>10</sub> H <sub>12</sub> O              | 15.10 | 1239  | 1241  | Cuminaldehyde                  | 122-03-2   |
| 26    | C <sub>10</sub> H <sub>14</sub> O              | 15.29 | 1242  | 1245  | Carvone                        | 99-49-0    |
| 27    | C <sub>10</sub> H <sub>16</sub> O              | 15.72 | 1253  | 1254  | Piperitone                     | 89-81-6    |
| 28    | C <sub>12</sub> H <sub>20</sub> O <sub>2</sub> | 15.95 | 1257  | 1258  | Linalyl acetate                | 115-95-7   |
| 29    | C <sub>12</sub> H <sub>20</sub> O <sub>2</sub> | 17.34 | 1285  | 1286  | Bornyl acetate                 | 76-49-3    |
| 30    | C <sub>10</sub> H <sub>14</sub> O              | 17.64 | 1289  | 1291  | Cumic alcohol                  | 536-60-7   |
| 31    | C <sub>12</sub> H <sub>20</sub> O <sub>2</sub> | 18.05 | 1301  | 1298  | 4-Terpinenyl acetate           | 4821-04-9  |
| 32    | C <sub>12</sub> H <sub>20</sub> O <sub>2</sub> | 18.98 | 1315  | 1318  | Terpineol, $\delta$ - acetate  | 93836-50-1 |
| 33    | C <sub>12</sub> H <sub>20</sub> O <sub>3</sub> | 20.22 | 1344  | 1342  | Exo-2-Hydroxycineole acetate   | 57709-95-2 |
| 34    | C <sub>12</sub> H <sub>20</sub> O <sub>2</sub> | 20.63 | 1350  | 1350  | Terpinyl acetate               | 80-26-2    |
| 35    | C <sub>12</sub> H <sub>20</sub> O <sub>2</sub> | 21.56 | 1364  | 1367  | Neryl acetate                  | 141-12-8   |

|    |                                                |       |      |      |                         |            |
|----|------------------------------------------------|-------|------|------|-------------------------|------------|
| 36 | C <sub>15</sub> H <sub>24</sub>                | 21.98 | 1376 | 1374 | (-)- $\alpha$ -Copaene  | 3856-25-5  |
| 37 | C <sub>12</sub> H <sub>20</sub> O <sub>2</sub> | 22.58 | 1382 | 1385 | Geranyl acetate         | 105-87-3   |
| 38 | C <sub>15</sub> H <sub>24</sub>                | 22.77 | 1389 | 1388 | Cubebene                | 13744-15-5 |
| 39 | C <sub>15</sub> H <sub>24</sub>                | 22.93 | 1391 | 1391 | $\beta$ -Elemene        | 515-13-9   |
| 40 | C <sub>15</sub> H <sub>24</sub>                | 24.24 | 1419 | 1415 | $\beta$ -Caryophyllene  | 87-44-5    |
| 41 | C <sub>15</sub> H <sub>24</sub>                | 26.09 | 1454 | 1449 | $\alpha$ -Caryophyllene | 6753-98-6  |
| 42 | C <sub>15</sub> H <sub>24</sub>                | 26.49 | 1461 | 1457 | (-)-Alloaromadendrene   | 25246-27-9 |
| 43 | C <sub>15</sub> H <sub>24</sub>                | 27.47 | 1477 | 1474 | $\gamma$ -Muurolene     | 30021-74-0 |
| 44 | C <sub>15</sub> H <sub>24</sub>                | 27.62 | 1481 | 1476 | Germacrene D            | 23986-74-5 |
| 45 | C <sub>15</sub> H <sub>24</sub>                | 27.89 | 1486 | 1481 | $\beta$ -Selinene       | 17066-67-0 |
| 46 | C <sub>13</sub> H <sub>20</sub> O              | 28.01 | 1486 | 1483 | $\beta$ -Lonone         | 79-77-6    |
| 47 | C <sub>15</sub> H <sub>26</sub> O              | 28.48 | 1493 | 1491 | Epicubebol              | 38230-60-3 |
| 48 | C <sub>15</sub> H <sub>24</sub>                | 28.76 | 1499 | 1495 | $\alpha$ -Muurolene     | 10208-80-7 |
| 49 | C <sub>15</sub> H <sub>24</sub>                | 29.48 | 1513 | 1508 | $\gamma$ -Cadinene      | 39029-41-9 |
| 50 | C <sub>15</sub> H <sub>24</sub>                | 30.09 | 1518 | 1520 | $\beta$ -Cadinene       | 523-47-7   |
| 51 | C <sub>15</sub> H <sub>26</sub> O              | 30.49 | 1515 | 1528 | Cubebol                 | 23445-02-5 |
| 52 | C <sub>15</sub> H <sub>24</sub>                | 30.77 | 1538 | 1533 | $\alpha$ -Cadinene      | 24406-05-1 |
| 53 | C <sub>15</sub> H <sub>26</sub> O              | 31.45 | 1549 | 1546 | Elemol                  | 639-99-6   |
| 54 | C <sub>15</sub> H <sub>24</sub>                | 31.72 | 1557 | 1551 | (1E,4E)-Germacrene B    | 15423-57-1 |
| 55 | C <sub>15</sub> H <sub>24</sub> O              | 32.84 | 1576 | 1571 | Spathulenol             | 6750-60-3  |
| 56 | C <sub>15</sub> H <sub>24</sub> O              | 33.10 | 1581 | 1575 | Caryophyllene oxide     | 1139-30-6  |
| 57 | C <sub>15</sub> H <sub>24</sub> O              | 34.53 | 1606 | 1600 | (-)-Humulene epoxide II | 19888-34-7 |
| 58 | C <sub>15</sub> H <sub>26</sub> O              | 36.33 | 1640 | 1635 | T-Cadinol               | 5937-11-1  |
| 59 | C <sub>15</sub> H <sub>26</sub> O              | 37.05 | 1653 | 1648 | $\alpha$ -Cadinol       | 481-34-5   |
| 60 | C <sub>15</sub> H <sub>26</sub> O              | 38.84 | 1684 | 1681 | $\alpha$ -Bisabolol     | 515-69-5   |
| 61 | C <sub>17</sub> H <sub>28</sub> O <sub>2</sub> | 43.23 | 1843 | 1816 | Farnesyl acetate        | 4128-17-0  |
| 62 | C <sub>20</sub> H <sub>32</sub>                | 44.40 | 1960 | 1952 | M-Camphorene            | 20016-73-3 |

---
