# Supplementary material for: The Discrimination and Characterization of Volatile Organic Compounds in Different Areas of Zanthoxylum bungeanum Pericarps and Leaves by HS-GC-IMS and HS-SPME-GC-MS
Source: Foods. 2022 Nov 21;11(22):3745. doi: 10.3390/foods11223745 (PMC9689319; doi:10.3390/foods11223745)
Supplement: Supplementary file 1 [file foods-11-03745-s001.zip]

Archive with 4 entries (4 files):
- Figure S1.pdf
- Table S1.pdf
- Table S2 .pdf
- Table S3.pdf
