# Supplementary figures and images for: The Discrimination and Characterization of Volatile Organic Compounds in Different Areas of Zanthoxylum bungeanum Pericarps and Leaves by HS-GC-IMS and HS-SPME-GC-MS
Source: MDPI journal article supplement (doi:10.3390/foods11223745), 2022-11-21

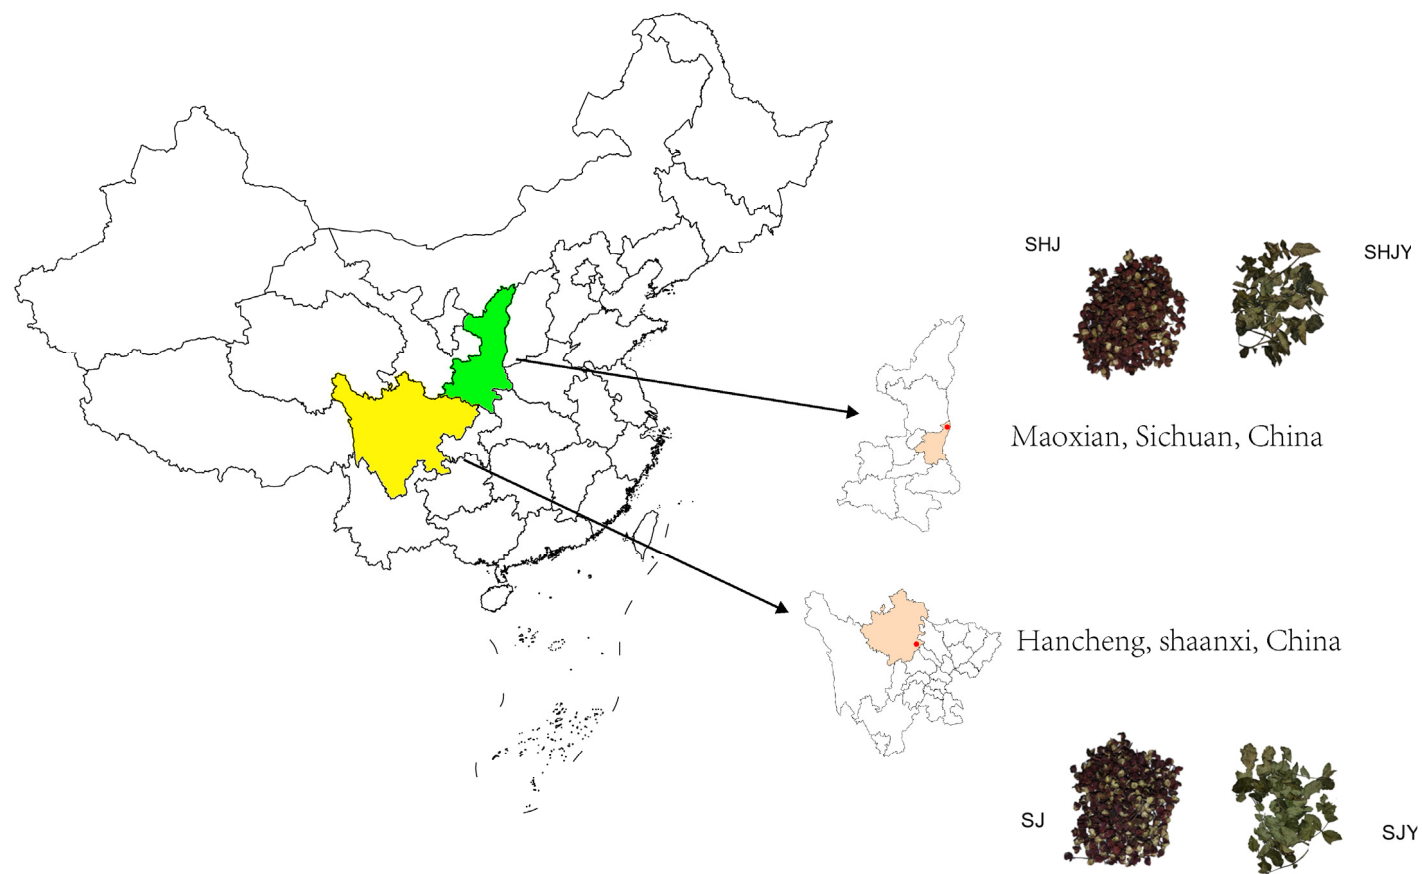

**Figure S1.** Different area of *Zanthoxylum bungeanum* pericarps and leaves.

Supplement: s1 [file s1]
